# Supplementary material for: Universal distortion function for steganography in an arbitrary domain
Source: Springer Nature journal article supplement (doi:10.1186/1687-417x-2014-1), 2014-01-03

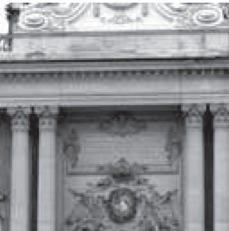

Cover image

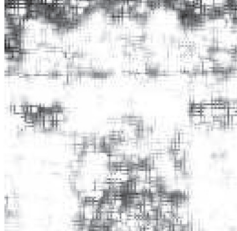

$\sigma = 10 \cdot \text{eps} \approx 2 \times 10^{-15}$

CSR 0.0203

SRM 0.2004

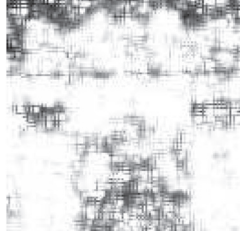

$\sigma = 10^{-6}$

CSR 0.2080

SRM 0.2002

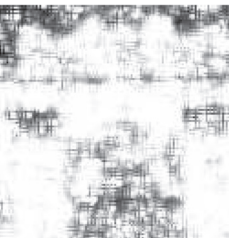

$\sigma = 10^{-3}$

CSR 0.0411

SRM 0.2013

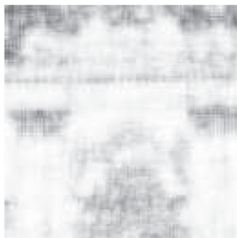

$\sigma = 1$

CSR 0.4518

SRM 0.1983

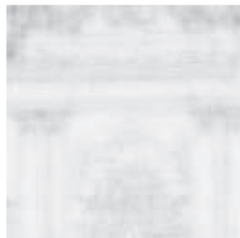

$\sigma = 10$

CSR 0.4432

SRM 0.1127

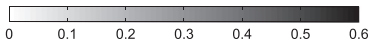

Supplement: 13635_2013_5000_MOESM2_ESM.pdf [file 13635_2013_5000_MOESM2_ESM.pdf]
