# Supplementary material for: Universal distortion function for steganography in an arbitrary domain
Source: Springer Nature journal article supplement (doi:10.1186/1687-417x-2014-1), 2014-01-03

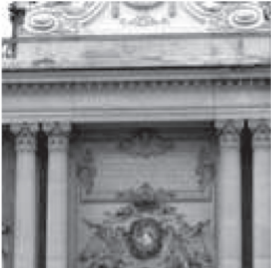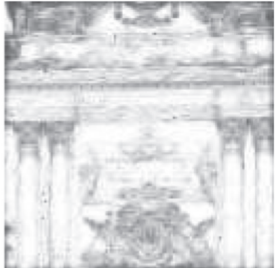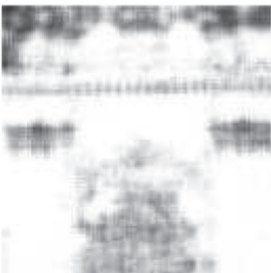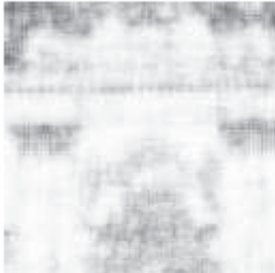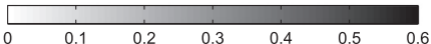

Supplement: 13635_2013_5000_MOESM8_ESM.pdf [file 13635_2013_5000_MOESM8_ESM.pdf]
